# Supplementary material for: Complexing AIEE-active tetraphenylthiophene fluorophore to poly(N-isopropyl acrylamide): fluorescence responses toward acid, base and metal ions
Source: Royal Society of Chemistry journal article supplement (doi:10.1039/c2ra20857a), 2012-01-01
Supplement: c2ra20857a.pdf [file c2ra20857a.pdf]

Supporting Information

**Complexing AIEE-active tetraphenylthiophene fluorophore to  
poly(*N*-isopropyl acrylamide): fluorescence responses toward acid,  
base and metal ions**

**Yi-Wen Lai, Shiao-Wei Kuo, and Jin-Long Hong\***

*Department of Materials and Optoelectrical Science, National Sun Yat-Sen University.*

*Kaohsiung, 80424, Taiwan. E-mail: [jlhong@mail.nsysu.edu.tw](mailto:jlhong@mail.nsysu.edu.tw); Fax:*

*+886 07 5254099; Tel: +886 07 5252000ext4065*

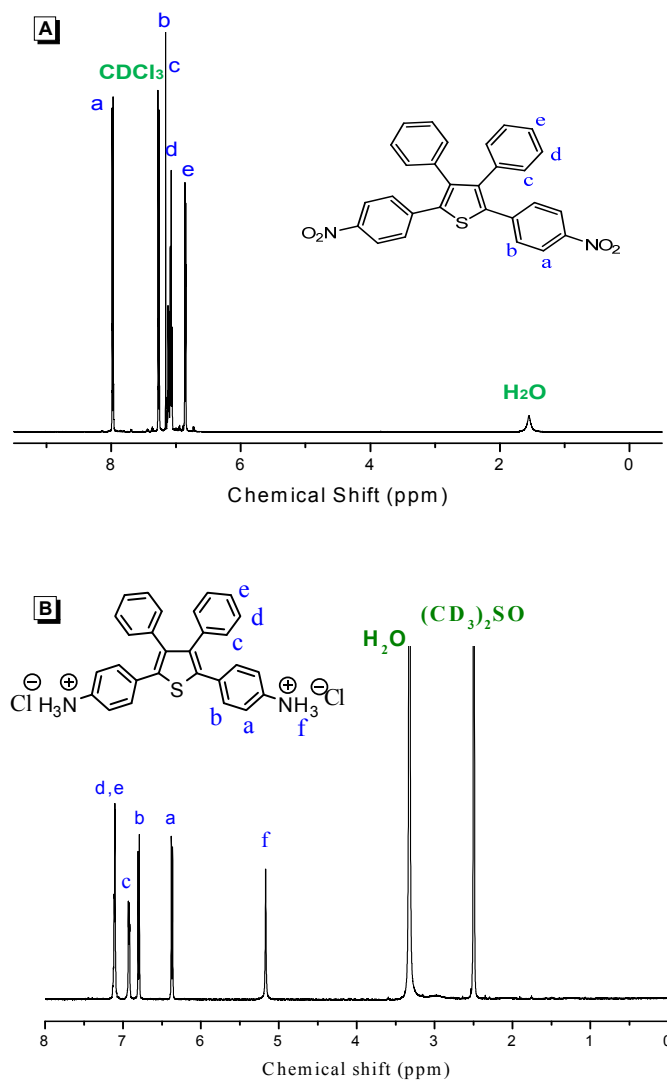

**Fig. S1**  $^1\text{H}$  NMR spectrum of (A) TP2NO<sub>2</sub> (CDCl<sub>3</sub>) and (B) TP2NH<sub>3</sub><sup>+</sup> (DMSO-d<sub>6</sub>).

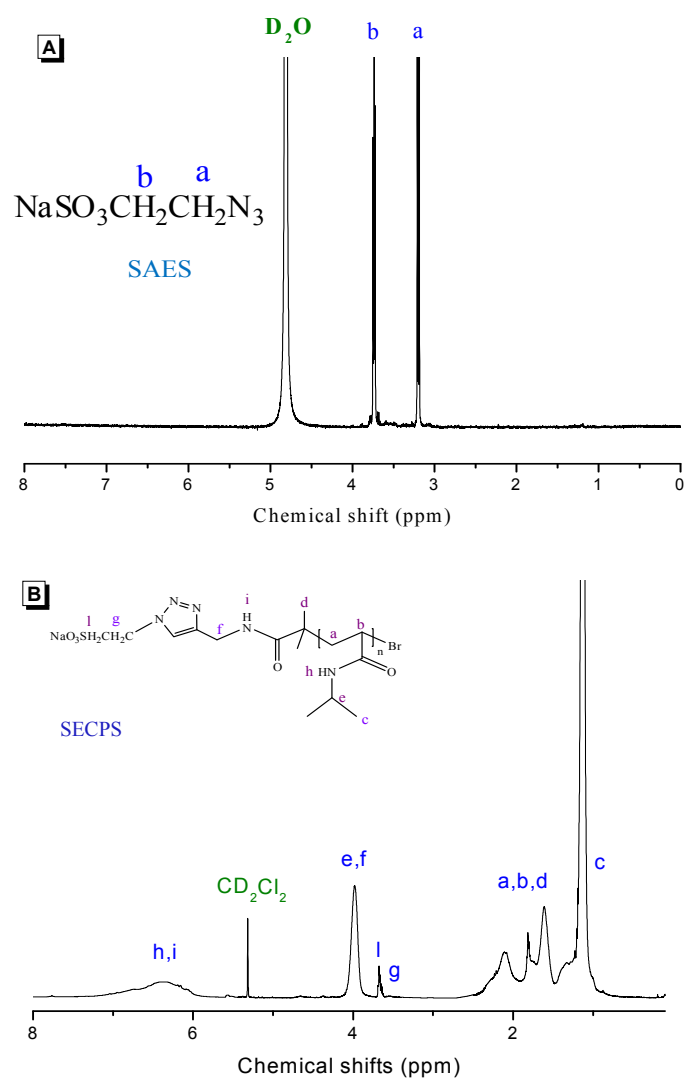

**Fig. S2**  $^1\text{H}$  NMR spectrum of (A) SAES ( $\text{D}_2\text{O}$ ) and (B) SECPS ( $\text{CD}_2\text{Cl}_2$ ).

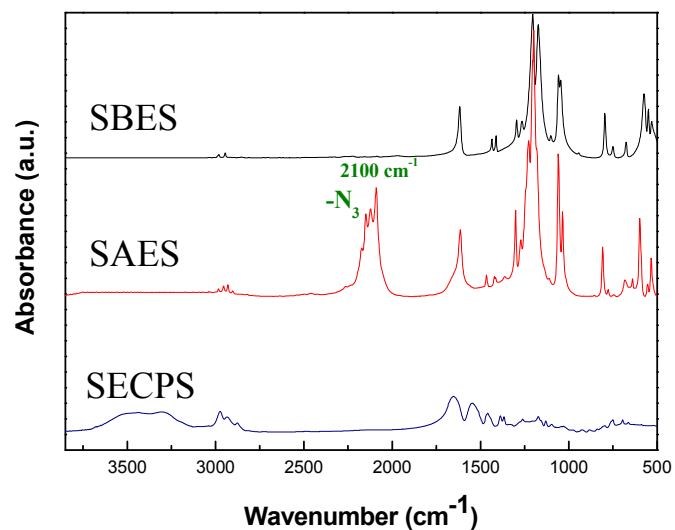

**Fig. S3** FT-IR spectra of SBES, SAES and SECPS.

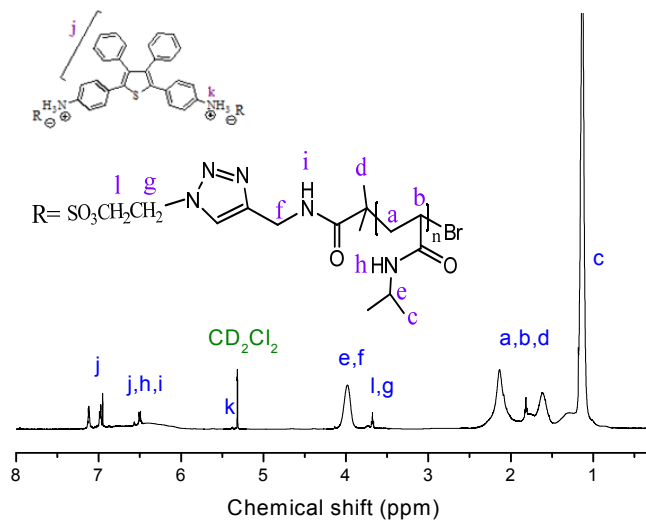

**Fig. S4** The <sup>1</sup>H NMR spectrum of TP-PNIPAM (CD<sub>2</sub>Cl<sub>2</sub>).

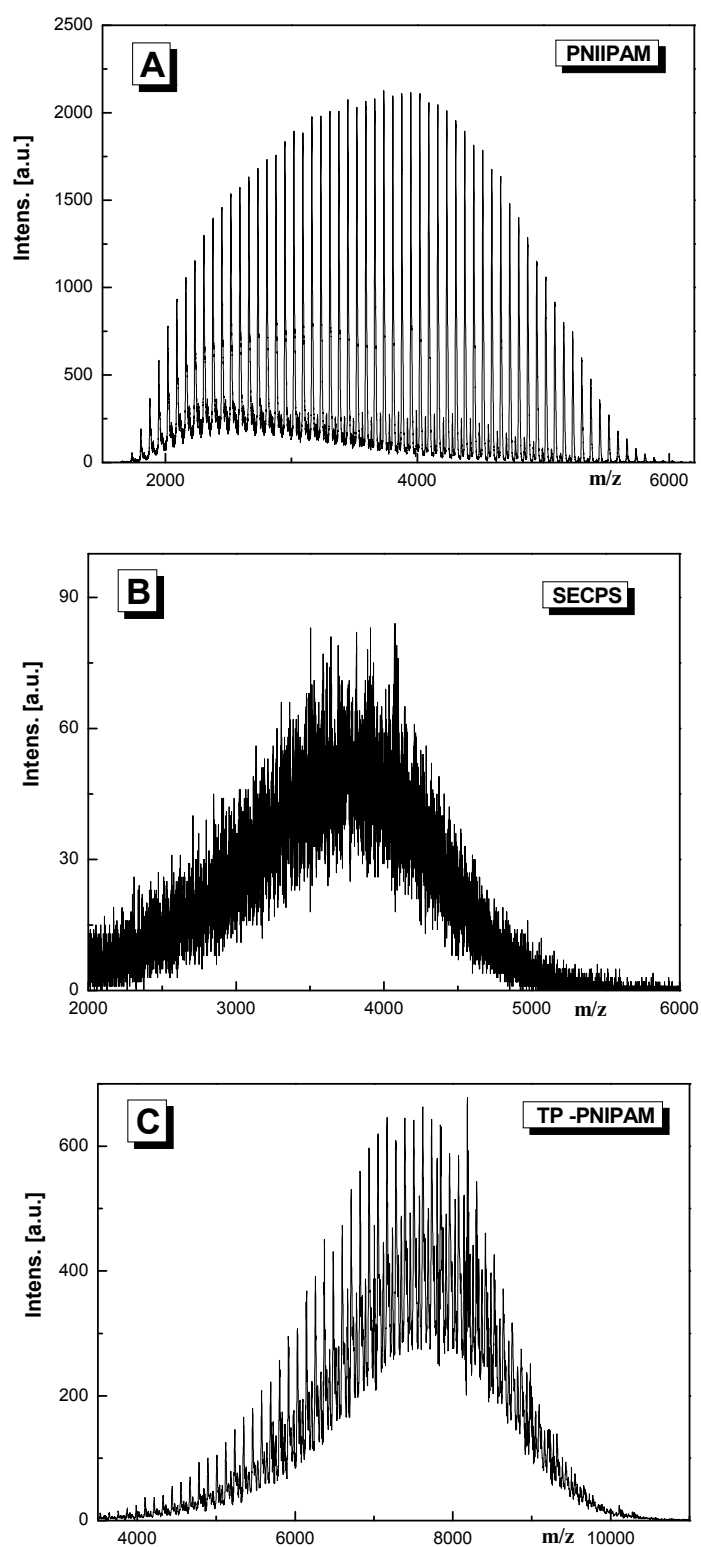

**Fig. S5** Mass spectra of (A) PNIPAM, (B) SECPS and (C) TP-PNIPAM.

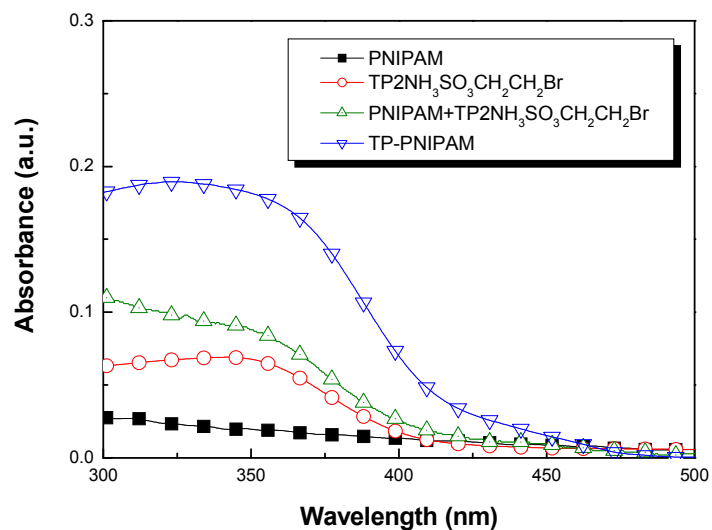

**Fig. S6** The UV-vis absorption spectra of aqueous PNIPAM solution ( $1.7 \times 10^{-4}$  M), solution of TP2NH<sub>3</sub>SO<sub>3</sub>CH<sub>2</sub>CH<sub>2</sub>Br ( $10^{-5}$  M) in DMF, TP2NH<sub>3</sub>SO<sub>3</sub>CH<sub>2</sub>CH<sub>2</sub>Br ( $10^{-5}$  M) in PNIPAM ( $1.7 \times 10^{-4}$  M), and DMSO solution of TP-PNIPAM ( $1.26 \times 10^{-4}$  M).

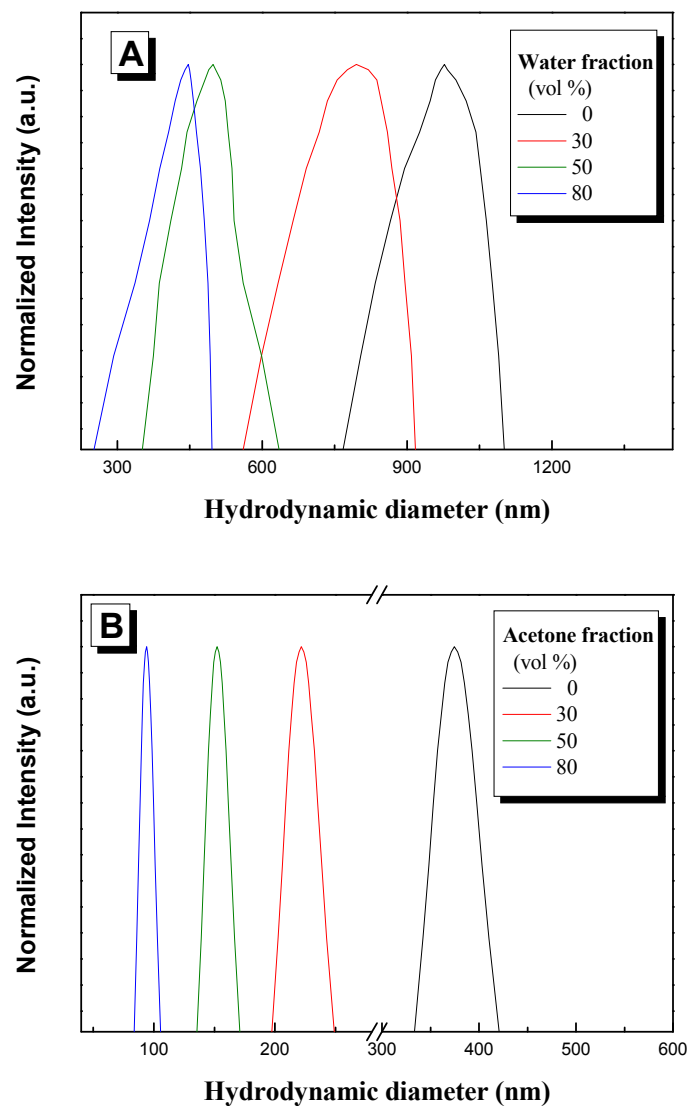

**Fig. S7** Histograms of (A) TP2NH<sub>3</sub><sup>+</sup> solutions in THF/water and (B) TP-PNIPAM (10<sup>-5</sup> M) in ethanol/acetone mixtures of different water and acetone contents.

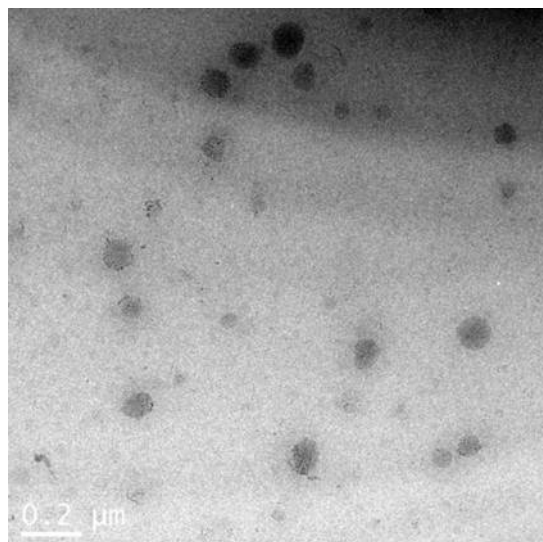

**Fig. S8** TEM image of micelles cast from the dilute aqueous solution of TP-PNIPAM. ([TP-PNIPAM] =  $1.335 \times 10^{-4}$  M)

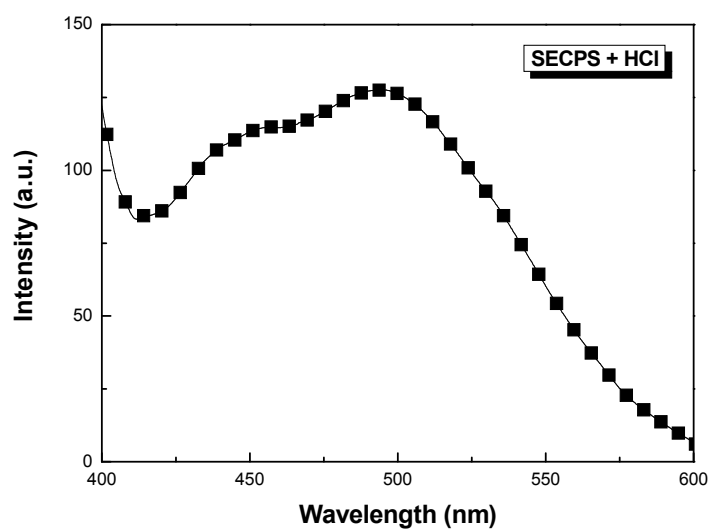

**Fig. S9** FL emission spectrum of the aqueous solution of SECPS at pH = 2. ([SECPS] =  $2.829 \times 10^{-4}$  M;  $\lambda_{\text{ex}} = 350$  nm).
